# Supplementary material for: Electrochemical synthesis of Au–MnO2 on electrophoretically prepared graphene nanocomposite for high performance supercapacitor and biosensor applications
Source: Royal Society of Chemistry journal article supplement (doi:10.1039/c5ta10515c), 2016-01-01
Supplement: c5ta10515c1.pdf [file c5ta10515c1.pdf]

## **Supporting Information**

### **Electrochemical Synthesis of Au-MnO<sub>2</sub> on Electrophoretically Prepared Graphene Nanocomposite for High performance Supercapacitor and Biosensor Applications†**

Vediyappan Veeramani,<sup>a,b†</sup> Bose Dinesh<sup>a†</sup>, Shen-Ming Chen,<sup>\*b</sup> and Ramiah Saraswathi<sup>\*a</sup>

<sup>a</sup>Department of Materials Science, School of Chemistry, Madurai Kamaraj University, Madurai – 625 021, Tamilnadu, India.

E-mail: [drrsaraswathi@gmail.com](mailto:drrsaraswathi@gmail.com) (R. Saraswathi).

<sup>b</sup>Department of Chemical Engineering and Biotechnology, National Taipei University of Technology, Taipei 10608, Taiwan. Tel: +886-2-27017147; Fax: +886-2-2702523.

E-mail: [smchen78@ms15.hinet.net](mailto:smchen78@ms15.hinet.net) (S-M. Chen)

*† These authors contributed equally*

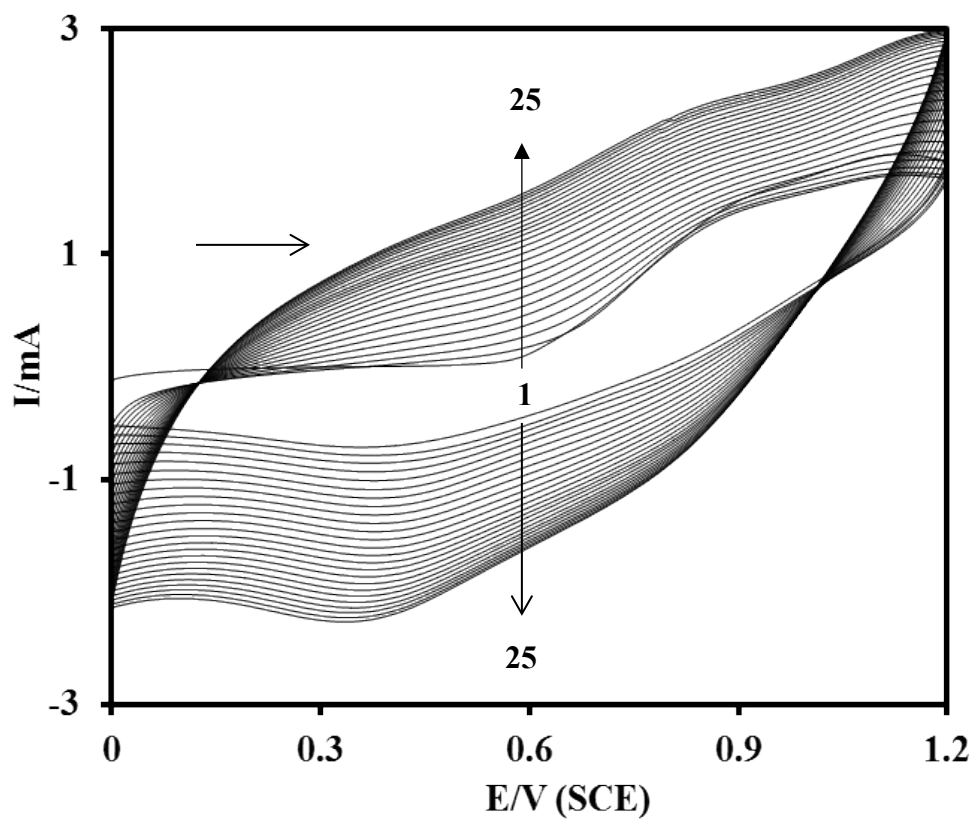

**Fig. S1** Consecutive cyclic voltammograms of  $MnO_2$ -Au co-deposition on EPD graphene modified SS substrate. Electrolyte: 0.01 mM  $HAuCl_4$  and 10 mM  $Mn(OAc)_2$  in 100 mM  $Na_2SO_4$  aqueous solution, Scan rate :  $50 mV S^{-1}$ .

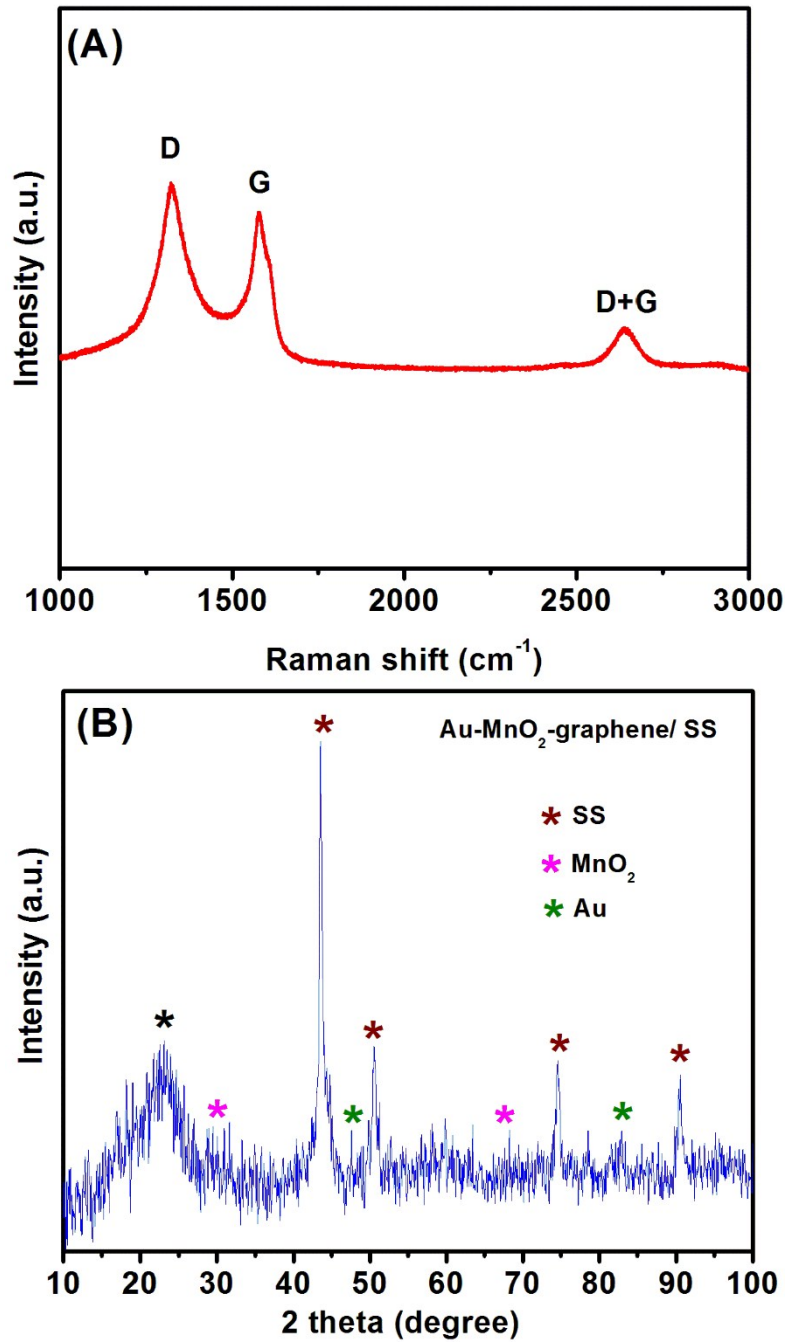

Fig. S2 (A) The Raman spectra of electrophoretically prepared graphene. (B) XRD pattern of Au-MnO<sub>2</sub>-graphene/SS.

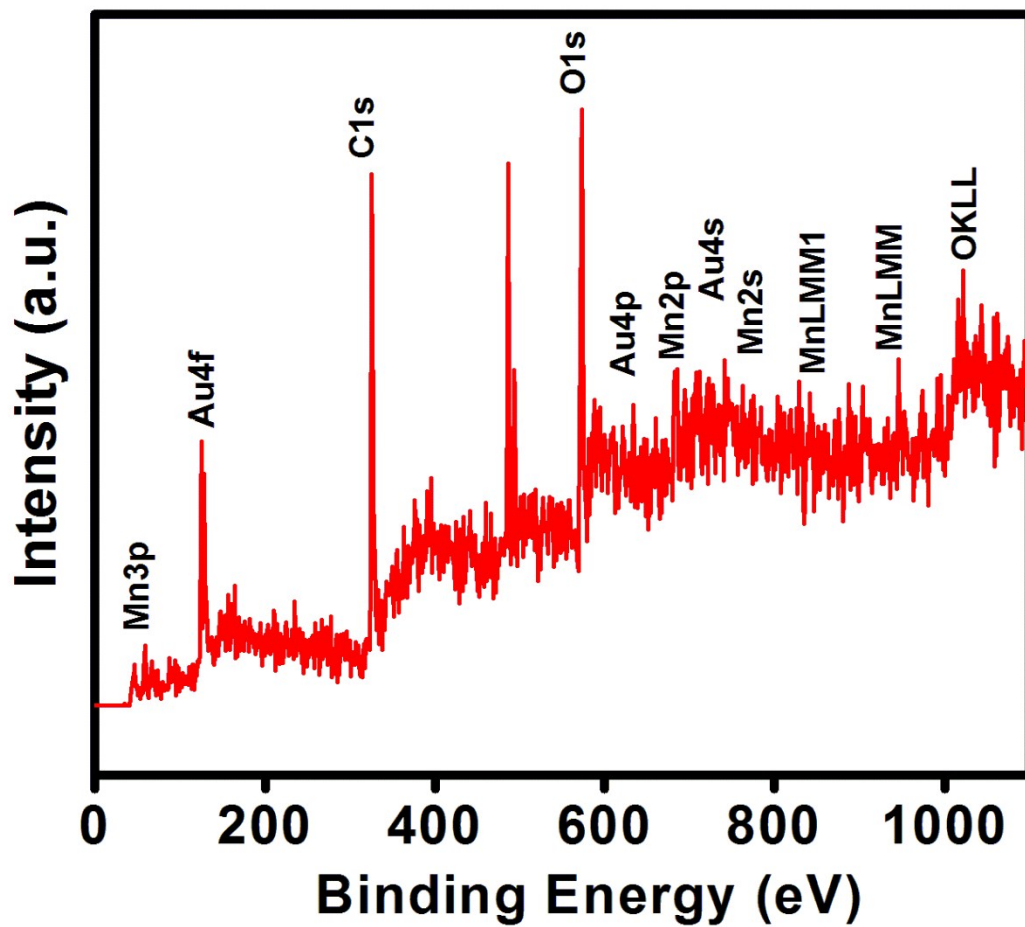

**Fig. S3** The full range of XPS for Au-MnO<sub>2</sub>-graphene.

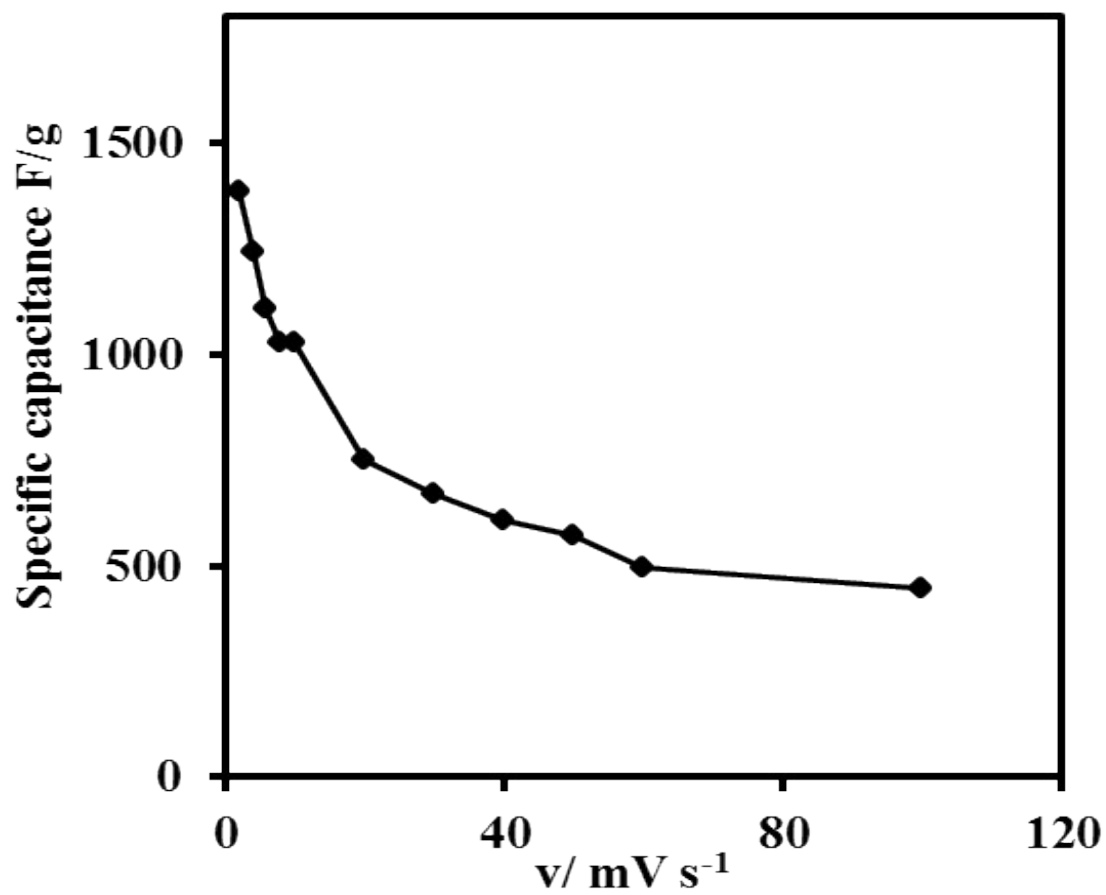

Fig. S4 Plot of specific capacitance against sweep rate.

**Table S1.** The calculated specific capacitance of the different electrodes.

| <b>S.No</b> | <b>Electrode Materials</b>    | <b>Calculated Specific capacitance<br/>( F/g)</b> |
|-------------|-------------------------------|---------------------------------------------------|
| 1           | Au-MnO <sub>2</sub>           | 177                                               |
| 2           | MnO <sub>2</sub> /graphene    | 447                                               |
| 3           | Au-MnO <sub>2</sub> -graphene | 575                                               |

Table S2. The Characteristics of chemically prepared MnO<sub>2</sub>-graphene nanocomposites.

| S. No | Preparation Method               | Morphology    | Electrolyte                                         | Potential Window (V) / current load (A g <sup>-1</sup> ) / scan rate (mV s <sup>-1</sup> ) | Specific Capacitance (F g <sup>-1</sup> ) | Ref.  |
|-------|----------------------------------|---------------|-----------------------------------------------------|--------------------------------------------------------------------------------------------|-------------------------------------------|-------|
| 1     | Chemical                         | Nanoparticles | 1 M Na <sub>2</sub> SO <sub>4</sub>                 | 0 – +1/ -/ 10                                                                              | 324                                       | [S1]  |
| 2     | Chemical                         | Needle        | 1 M Na <sub>2</sub> SO <sub>4</sub>                 | 0 – +1/ 0.2/ -                                                                             | 197                                       | [S2]  |
| 3     | Chemical                         | Nanowires     | 1 M Na <sub>2</sub> SO <sub>4</sub>                 | 0 – +2.0/ -/ 10                                                                            | 31                                        | [S3]  |
| 4     | Chemical                         | Nano needle   | 1M Na <sub>2</sub> SO <sub>4</sub>                  | -0.1 – +0.9/ -/ 10                                                                         | 328                                       | [S4]  |
| 5     | Hydrothermal                     | Nano flowers  | 1 M Na <sub>2</sub> SO <sub>4</sub>                 | -0.2 – +0.8/ 2/ -                                                                          | 560                                       | [S5]  |
| 6     | Hydrothermal                     | Nanorods      | 2 M (NH <sub>4</sub> ) <sub>2</sub> SO <sub>4</sub> | 0 – +1/ -/ 10                                                                              | 276                                       | [S6]  |
| 7     | Hydrothermal                     | -             | 1 M Na <sub>2</sub> SO <sub>4</sub>                 | -0.2 – +0.8/ 5/ -                                                                          | 263                                       | [S7]  |
| 8     | Electrostatic Adsorption         | Nanoparticles | 0.1 M Na <sub>2</sub> SO <sub>4</sub>               | 0 – +8/ -/ 2                                                                               | 206                                       | [S8]  |
| 9     | Electrostatic interaction        | Honeycomb     | 0.5 M Na <sub>2</sub> SO <sub>4</sub>               | 0 – +1/ -/ 0.5                                                                             | 210                                       | [S9]  |
| 10    | Stirring and Refluxing           | Nanoneedles   | 1M Na <sub>2</sub> SO <sub>4</sub>                  | 0 – +1/ -/ 200                                                                             | 124                                       | [S10] |
| 11    | Self-controlled redox deposition | -             | 1 M H <sub>2</sub> SO <sub>4</sub>                  | 0 – +1/ 0.25/ -                                                                            | 850                                       | [S11] |
| 12    | Co-precipitation                 |               | 1 M KOH                                             | -0.8 – +0.1/ 1/ -                                                                          | 367                                       | [S12] |

## References

- (S1) Y. Qian, S. Lu and F. Gao, *J. Mater. Sci.* 2011, **46**, 3517-3522.
- (S2) S. Chen, J. Zhu, X. Wu, Q. Han and X. Wang, *ACS Nano*, 2010, **4**, 2822-2830.
- (S3) Z. S. Wu, W. Ren, D.W. Wang, F. Li, B. Liu and H. M. Cheng, *ACS Nano*, 2010, **4**, 5835-5842.
- (S4) M. Kim, Y. Hwang and J. Kim, *J. Power Sources*, 2013, **239**, 225-233.
- (S5) X. Dong, X. Wang, J. Wang, H. Song, X. Li, L. Wang, M. C. Park, C. M. Li and P. Chen, *Carbon*, 2012, **50**, 4865-4870.
- (S6) J. Yan, Z. Fan, T. Wei, Z. Qie, S. Wang and M. Zhang, *Mater. Sci. Eng. B*, 2008, **151**, 174-178.
- (S7) W. Yang, Z. Gao, J. Wang, B. Wang, Q. Liu, Z. Li, T. Mann, P. Yang, M. Zhang and L. Liu, *Electrochim. Acta*, 2012, **69**, 112-117.
- (S8) D. Zhai, B. Li, H. Du, G. Gao, L. Gan, Y. He, Q. Yang and F. Kang, *Carbon*, 2012, **50**, 5034-5043.
- (S9) J. Zhu and J. He, *ACS Appl. Mater. Interfaces*, 2012, **4**, 1770-1776.
- (S10) Y. Li, N. Zhao, C. Shi, E. Liu and C. He, *J. Phys. Chem. C*, 2012, **116**, 25226-25232.
- (S11) X. Zhao, L. Zhang, S. Murali, M. D. Stoller, Q. Zhang, Y. Zhu and R. S. Ruoff, *ACS Nano*, 2012, **6**, 5404-5412.
- (S12) M. Pang, G. Long, S. Jiang, Y. Ji, W. Han, B. Wang, X. Liu and Y. Xi. *Materials Science and Engineering B* 2015, **194**, 41-47.
